# Supplementary material for: A prospective cohort study comparing household contact and water Vibrio cholerae isolates in households of cholera patients in rural Bangladesh
Source: PLoS Negl Trop Dis. 2018 Jul 27;12(7):e0006641. doi: 10.1371/journal.pntd.0006641 (PMC6063393; doi:10.1371/journal.pntd.0006641)
Supplement: S1 Dataset — (XLSX) [file pntd.0006641.s002.xlsx]

## Sheet: S1_Dataset
Strain_ID	Strain_Number	VC0147	VC0437	VC1650	VCA0171	VCA0283	HouseholdID	MLVA_Genotype	ParticipantID	Sample_ID	Interview_Date	Clinical	Outbreak
BCS-1 A	BCS-1	9	9	7	16	19	665602	909071619	665602	335602	2015-04-26	1	1
BCS-1D	BCS-1	9	9	7	16	19	665602	909071619	665602	335602	2015-04-26	1	1
BCS-1A	BCS-1	9	9	7	16	19	665602	909071619	665602	335602	2015-04-26	1	1
BCS-1B	BCS-1	9	9	7		19	665602	909079919	665602	335602	2015-04-26	1	1
BCS-2 A	BCS-2	9	9	7	16	18	665603	909071618	665603	335604	2015-04-29	1	1
BCS-2C	BCS-2	9	9	7	16	18	665603	909071618	665603	335604	2015-04-29	1	1
BCS-2B	BCS-2	9	9	7	16	18	665603	909071618	665603	335604	2015-04-29	1	1
BCS-2E	BCS-2	9	9	7		18	665603	909079918	665603	335604	2015-04-29	1	1
BCS-2D	BCS-2	9	9	7		18	665603	909999918	665603	335604	2015-04-29	1	1
BCS-3B	BCS-3	9	9	7	15	19	665003	909071519	665003	335605	2015-05-05	1	1
BCS-3E	BCS-3	9	9	7		19	665003	909079919	665003	335605	2015-05-05	1	1
BCS-3A	BCS-3	9	9	7		19	665003	909999919	665003	335605	2015-05-05	1	1
BCS-3D	BCS-3	9	9	7		19	665003	9909079919	665003	335605	2015-05-05	1	1
BCS-4 A	BCS-4	9	9	7	15	19	665005	909071519	665005	335607	2015-05-10	1	1
BCS-4A	BCS-4	9	9	7	15	19	665005	909071519	665005	335607	2015-05-10	1	1
BCS-4B	BCS-4	9	9	7		19	665005	909079919	665005	335607	2015-05-10	1	1
BCS-4E	BCS-4	9	9	7		19	665005	909079919	665005	335607	2015-05-10	1	1
BCS-4D	BCS-4	9	9	7		19	665005	909079919	665005	335607	2015-05-10	1	1
BCS-5 A	BCS-5	9	9	7	15	19	665604	909071519	665604	335608	2015-05-10	1	1
BCS-5B	BCS-5	9	9	7	15	19	665604	909071519	665604	335608	2015-05-10	1	1
BCS-5C	BCS-5	9	9	7		19	665604	909079919	665604	335608	2015-05-10	1	1
BCS-5D	BCS-5	9	9	7		19	665604	909999919	665604	335608	2015-05-10	1	1
BCS-5A	BCS-5	9	9	7		19	665604	909999919	665604	335608	2015-05-10	1	1
BCS-6 A	BCS-6	9	9	7	15	19	665006	909071519	665006	335609	2015-05-11	1	1
BCS-6B	BCS-6	9	9	7	15	19	665006	909071519	665006	335609	2015-05-11	1	1
BCS-6A	BCS-6	9	9	7	15	19	665006	909071519	665006	335609	2015-05-11	1	1
BCS-6C	BCS-6	9	9	7	15	20	665006	909071520	665006	335609	2015-05-11	1	1
BCS-6D	BCS-6	9	9	8		19	665006	909089919	665006	335609	2015-05-11	1	1
BCS-7A	BCS-7	9	9	7	16	18	665605	909071618	665605	335610	2015-05-12	1	1
BCS-7E	BCS-7	9	9	7	16	18	665605	909071618	665605	335610	2015-05-12	1	1
BCS-7D	BCS-7	9	9	7	16	18	665605	909071618	665605	335610	2015-05-12	1	1
BCS-7B	BCS-7	9	9	7	16	18	665605	909991618	665605	335610	2015-05-12	1	1
BCS-8 A	BCS-8	9	9	7	15	19	665606	909071519	665606	335611	2015-05-17	1	1
BCS-8A	BCS-8	9	9	7	15	19	665606	909071519	665606	335611	2015-05-17	1	1
BCS-8C	BCS-8	9	9	7	16	19	665606	909071619	665606	335611	2015-05-17	1	1
BCS-8B	BCS-8	9	9	7		19	665606	909079919	665606	335611	2015-05-17	1	1
BCS-8E	BCS-8	9	9	7		19	665606	909079919	665606	335611	2015-05-17	1	1
BCS-9 A	BCS-9	9	9	7	15	19	665607	909071519	665607	335612	2015-05-17	1	1
BCS-9A	BCS-9	9	9	7	15	19	665607	909071519	665607	335612	2015-05-17	1	1
BCS-9B	BCS-9	9	9	7	15	19	665607	909071519	665607	335612	2015-05-17	1	1
BCS-9D	BCS-9	9	9	7	15	19	665607	909071519	665607	335612	2015-05-17	1	1
BCS-9C	BCS-9	9	9	7		19	665607	909079919	665607	335612	2015-05-17	1	1
BCS-10	BCS-10	9	9	7	15	19	665608	909071519	665608	335613	2015-05-19	1	1
BCS-10D	BCS-10	9	9	7	15	19	665608	909071519	665608	335613	2015-05-19	1	1
BCS-10B	BCS-10	9	9	7	15	19	665608	909071519	665608	335613	2015-05-19	1	1
BCS-10A	BCS-10	9	9	7	16	19	665608	909071619	665608	335613	2015-05-19	1	1
BCS-10E	BCS-10	9	9	7		19	665608	909079919	665608	335613	2015-05-19	1	1
BCS-11	BCS-11	9	9	7	15	19	665609	909071519	665609	335614	2015-05-19	1	1
BCS-11B	BCS-11	9	9	7	15	19	665609	909071519	665609	335614	2015-05-19	1	1
BCS-11C	BCS-11	9	9	7	15	19	665609	909071519	665609	335614	2015-05-19	1	1
BCS-11D	BCS-11	9	9	7	15	19	665609	909071519	665609	335614	2015-05-19	1	1
BCS-11E	BCS-11	9	9	7		19	665609	909079919	665609	335614	2015-05-19	1	1
BCS-12	BCS-12	9	9	7	16	17	665610	909071617	665610	335615	2015-06-01	1	1
BCS-12A	BCS-12	9	9	7	16	17	665610	909071617	665610	335615	2015-06-01	1	1
BCS-12B	BCS-12	9	9	7	16	17	665610	909071617	665610	335615	2015-06-01	1	1
BCS-12C	BCS-12	9	9	7	16	17	665610	909071617	665610	335615	2015-06-01	1	1
BCS-12E	BCS-12	9	9	7	16	17	665610	909071617	665610	335615	2015-06-01	1	1
BCS-13D	BCS-13	9	9	7	16	18	665611	909071618	665611	335616	2015-06-02	1	1
BCS-13C	BCS-13	9	9	7	16	18	665611	909071618	665611	335616	2015-06-02	1	1
BCS-13E	BCS-13	9	9	7	16	18	665611	909071618	665611	335616	2015-06-02	1	1
BCS-13	BCS-13	9	9	7	15	18	665611	909991518	665611	335616	2015-06-02	1	1
BCS-13A	BCS-13	9	9	7	15	18	665611	909991518	665611	335616	2015-06-02	1	1
BCS-14	BCS-14	9	9	7	16	19	665612	909071619	665612	335617	2015-06-25	1	1
BCS-14C	BCS-14	9	9	7	16	19	665612	909071619	665612	335617	2015-06-25	1	1
BCS-14D	BCS-14	9	9	7	16	19	665612	909991619	665612	335617	2015-06-25	1	1
BCS-14E	BCS-14	9	9	7	18	19	665612	909991819	665612	335617	2015-06-25	1	1
BCS-14B	BCS-14	9	9	7		19	665612	909999919	665612	335617	2015-06-25	1	1
BCS-19	BCS-19	9	9	7	17	18	665613	909071718	665613	335624	2015-10-10	1	2
BCS-19E	BCS-19	9	9	7	17	18	665613	909071718	665613	335624	2015-10-10	1	2
BCS-19C	BCS-19	9	9	7	17	18	665613	909991718	665613	335624	2015-10-10	1	2
BCS-19B	BCS-19	9	9	7	17	18	665613	909991718	665613	335624	2015-10-10	1	2
BCS-19A	BCS-19	9	9	7	17	18	665613	909991718	665613	335624	2015-10-10	1	2
BCS-15	BCS-15	9	9	7	17	18	665614	909071718	665614	335625	2015-10-10	1	2
BCS-15A	BCS-15	9	9	7	17	18	665614	909071718	665614	335625	2015-10-10	1	2
BCS-15D	BCS-15	9	9	7	17	18	665614	909071718	665614	335625	2015-10-10	1	2
BCS-15C	BCS-15	9	9	7	17		665614	909071799	665614	335625	2015-10-10	1	2
BCS-15E	BCS-15	9	9	7	17	18	665614	909991718	665614	335625	2015-10-10	1	2
BCS-20	BCS-20	9	9	7	17	18	665616	909991718	665616	335623	2015-10-10	1	2
BCS-16	BCS-16	9	9	7	17	18	665617	909071718	665617	335628	2015-10-11	1	2
BCS-16C	BCS-16	9	9	7	17	18	665617	909071718	665617	335628	2015-10-11	1	2
BCS-16E	BCS-16	9	9	7	17	18	665617	909991718	665617	335628	2015-10-11	1	2
BCS-16A	BCS-16	9	9	7	17	18	665617	909991718	665617	335628	2015-10-11	1	2
BCS-16B	BCS-16	9	9	7	17	18	665617	909991718	665617	335628	2015-10-11	1	2
BCS-17	BCS-17	9	9	7	17	18	665618	909071718	665618	335629	2015-10-11	1	2
BCS-17B	BCS-17	9	9	7	17	19	665618	909071719	665618	335629	2015-10-11	1	2
BCS-17E	BCS-17	9	9	7	17	18	665618	909991718	665618	335629	2015-10-11	1	2
BCS-17C	BCS-17	9	9	7	17	18	665618	909991718	665618	335629	2015-10-11	1	2
BCS-17D	BCS-17	9	9	7	17	18	665618	909991718	665618	335629	2015-10-11	1	2
BCS-18C	BCS-18	9	9	7	17	18	665620	909071718	665620	335631	2015-10-11	1	2
BCS-18A	BCS-18	9	9	7	17	18	665620	909071718	665620	335631	2015-10-11	1	2
BCS-18D	BCS-18	9	9	7	17	18	665620	909071718	665620	335631	2015-10-11	1	2
BCS-18B	BCS-18	9	9	7	17	19	665620	909071719	665620	335631	2015-10-11	1	2
BHS-2 A	BHS-2	9	9	7		19	665602	999079919	445607	22560705	2015-05-01	1	1
BHS-4 A	BHS-4	9	9	7		18	665003	999079918	445010	22501001	2015-05-06	1	1
BHS-3E	BHS-3	9	9	7		18	665603	999079918	445612	22561207	2015-05-06	1	1
BHS-3 A	BHS-3	9	9	7	16	17	665603	999991617	445612	22561207	2015-05-06	1	1
BHS-5 A	BHS-5	9	9	7		19	665003	999079919	445006	22500607	2015-05-12	1	1
BHS-8 A	BHS-8	10		8		18	665605	1099089918	445617	22561703	2015-05-15	1	1
BHS-9E	BHS-9	9	9	7		18	665605	999079918	445617	22561705	2015-05-17	1	1
BHS-9 A	BHS-9	9	9	7	16	18	665605	999991618	445617	22561705	2015-05-17	1	1
BHS-11	BHS-11	9	9	7	13	20	665606	909991320	445622	22562201	2015-05-19	1	1
BHS-11D	BHS-11	9	9	7	15	20	665606	999991520	445622	22562201	2015-05-19	1	1
BCS-21	BCS-21	9	9	7	17	18	665615	909071718	665615	335626	2015-10-10	1	2
BCS-21B	BCS-21	9	9	7	17	18	665615	999991718	665615	335626	2015-10-10	1	2
BCS-22	BCS-22	9	9	7		18	665619	999079918	665619	335630	2015-10-11	1	2
BHS-13	BHS-13	11		7		21	665615	1199079921	445639	22563901	2015-10-12	1	2
BHS-14	BHS-14	9	9	7		18	665613	999079918	445635	22563503	2015-10-13	1	2
BHS-16B	BHS-16	9	9	7	17	18	665616	999991718	445640	22564003	2015-10-13	1	2
BCS-23	BCS-23	9	9	7	13	19	665621	999071319	665621	335633	2016-05-31	1	3
BW-1 A-	BW-1	9	9	7	15	19	665607	999071519		99560701	2015-05-18	0	1
BW-1G	BW-1	9	9	7	15		665607	999071599		99560701	2015-05-18	0	1
BW-1H	BW-1	9	9	7	15		665607	999071599		99560701	2015-05-18	0	1
BW-1B	BW-1	9	9	7	15		665607	999071599		99560701	2015-05-18	0	1
BW-1A	BW-1	9	9	7	15		665607	999071599		99560701	2015-05-18	0	1
BW-1C	BW-1	9	9	7	15	19	665607	999991519		99560701	2015-05-18	0	1
BW-1E	BW-1	9	9	7	15	19	665607	999991519		99560701	2015-05-18	0	1
BW-2 A-	BW-2	9	9	7	16	17	665611	999071617		99561101	2015-06-07	0	1
BW-2E	BW-2	9	9	7	16	17	665611	999071617		99561101	2015-06-07	0	1
BW-2B	BW-2	9	9	7	16	17	665611	999071617		99561101	2015-06-07	0	1
BW-2A	BW-2	9	9	7	16		665611	999071699		99561101	2015-06-07	0	1
BW-2J	BW-2	9	9	7	16		665611	999071699		99561101	2015-06-07	0	1
BW-2D	BW-2	9	9	7	16		665611	999071699		99561101	2015-06-07	0	1
BW-2F	BW-2	9	9	7	16		665611	999071699		99561101	2015-06-07	0	1
BW-2G	BW-2	9	9	7	16		665611	999071699		99561101	2015-06-07	0	1
BW-2C	BW-2	9	9	7	16		665611	999071699		99561101	2015-06-07	0	1
BW-3B	BW-3	9	9	7	16	19	665612	909991619		99561203	2015-06-28	0	1
BW-3 A-	BW-3	9	9	7	16	19	665612	999071619		99561203	2015-06-28	0	1
BW-3E	BW-3	9	9	7	16	19	665612	999071619		99561203	2015-06-28	0	1
BW-3C	BW-3	9	9	7	16	19	665612	999071619		99561203	2015-06-28	0	1
BW-3D	BW-3	9	9	7	16	19	665612	999071619		99561203	2015-06-28	0	1
BW-3F	BW-3	9	9	7	16	19	665612	999071619		99561203	2015-06-28	0	1
BW-3A	BW-3	9	9	7	16		665612	999071699		99561203	2015-06-28	0	1
BW-3G	BW-3	9	9	7	16		665612	999071699		99561203	2015-06-28	0	1
BW-3J	BW-3	9	9	7	16	19	665612	999991619		99561203	2015-06-28	0	1
BW-3I	BW-3	9	9	7	16	19	665612	999991619		99561203	2015-06-28	0	1
BW-4 A-	BW-4	9	9	7	17	18	665613	999071718		99561301	2015-10-11	0	2
BW-4F	BW-4	9	9	7	17	18	665613	999071718		99561301	2015-10-11	0	2
BW-4J	BW-4	9	9	7	17	18	665613	999071718		99561301	2015-10-11	0	2
BW-4B	BW-4	9	9	7	17	19	665613	999071719		99561301	2015-10-11	0	2
BW-4E	BW-4	9	9	7	17		665613	999071799		99561301	2015-10-11	0	2
BW-4I	BW-4	9	9	7	17		665613	999071799		99561301	2015-10-11	0	2
BW-4C	BW-4	9	9	7	17		665613	999071799		99561301	2015-10-11	0	2
BW-4G	BW-4	9	9	7	17	18	665613	999991718		99561301	2015-10-11	0	2
BW-4H	BW-4	9	9	7	17	18	665613	999991718		99561301	2015-10-11	0	2
BW-4A	BW-4	9	9	7	17	18	665613	999991718		99561301	2015-10-11	0	2
BW-5D	BW-5	9	9	7	16		665614	999071699		88561401	2015-10-11	0	2
BW-5 A-	BW-5	9	9	7	17	18	665614	999071718		88561401	2015-10-11	0	2
BW-5F	BW-5	9	9	7	17	18	665614	999071718		88561401	2015-10-11	0	2
BW-5C	BW-5	9	9	7	17	18	665614	999071718		88561401	2015-10-11	0	2
BW-5H	BW-5	9	9	7	17		665614	999071799		88561401	2015-10-11	0	2
BW-5G	BW-5	9	9	7		18	665614	999079918		88561401	2015-10-11	0	2
BW-7C	BW-7	9	9	7	17	18	665616	909991718		88561601	2015-10-11	0	2
BW-7 A-	BW-7	9	9	7	17	18	665616	999071718		88561601	2015-10-11	0	2
BW-6B	BW-6	9	9	7	17		665616	999071799		99561601	2015-10-11	0	2
BW-7B	BW-7	9	9	7	17		665616	999071799		88561601	2015-10-11	0	2
BW-6 A-	BW-6	9	9	7	17	18	665616	999991718		99561601	2015-10-11	0	2
BW-6G	BW-6	9	9	7	17	18	665616	999991718		99561601	2015-10-11	0	2
BW-7J	BW-7	9	9	7	17	18	665616	999991718		88561601	2015-10-11	0	2
BW-7A	BW-7	9	9	7	17	18	665616	999991718		88561601	2015-10-11	0	2
BW-7I	BW-7	9	9	7	17	18	665616	999991718		88561601	2015-10-11	0	2
BW-7F	BW-7			7	17	18	665616	9999071718		88561601	2015-10-11	0	2
BW-7G	BW-7			7	17	18	665616	9999071718		88561601	2015-10-11	0	2
BW-9A	BW-9	9	9	7	17		665619	999071799		88561901	2015-10-12	0	2
BW-9B	BW-9	9	9	7	17	18	665619	999991718		88561901	2015-10-12	0	2
BHS-16E	BHS-16	9	9	7		18	665616	909999918	445640	22564003	2015-10-13	1	2
BHS-16C	BHS-16	9	9	7		18	665616	909999918	445640	22564003	2015-10-13	1	2
BHS-16	BHS-16	9	9	7	17	18	665616	999071718	445640	22564003	2015-10-13	1	2
BHS-17E	BHS-17	9	9	7		18	665617	909999918	445643	22564303	2015-10-14	1	2
BHS-17	BHS-17	9	9	7	17	18	665617	999991718	445643	22564303	2015-10-14	1	2
BHS-17C	BHS-17	9	9	7	17	18	665617	999991718	445643	22564303	2015-10-14	1	2
BHS-17B	BHS-17	9	9	7	17	18	665617	999991718	445643	22564303	2015-10-14	1	2
BHS-18	BHS-18	9	9	7	13	19	665621	909991319	445651	22565105	2016-06-05	1	3
BHS-18B	BHS-18	9	9	7	13		665621	999071399	445651	22565105	2016-06-05	1	3
BHS-18D	BHS-18	9	9	7	13		665621	999071399	445651	22565105	2016-06-05	1	3
BHS-18A	BHS-18	9	9	7	13		665621	999071399	445651	22565105	2016-06-05	1	3
BHS-19	BHS-19	9	9	7	13	19	665621	909991319	445651	22565107	2016-06-07	1	3
BHS-19E	BHS-19	9	9	7	13		665621	999071399	445651	22565107	2016-06-07	1	3
BHS-19D	BHS-19	9	9	7	13		665621	999071399	445651	22565107	2016-06-07	1	3
MES-4 A	MES-4	9	9	7		18	665403	999079918	665403	335079	2015-05-10	1	1
MES-4A	MES-4	9	9	7		18	665403	999079918	665403	335079	2015-05-10	1	1
MES-4B	MES-4	9	9	7		19	665403	999079919	665403	335079	2015-05-10	1	1
BW-9 A-	BW-9	9	9	7	17	18	665619	999071718		88561901	2015-10-12	0	2
BW-9E	BW-9	9	9	7	17	18	665619	999071718		88561901	2015-10-12	0	2
BW-13 A	BW-13	9	9	7	17	18	665613	909071718		88561305	2015-10-15	0	2
BW-13D	BW-13	9	9	7		18	665613	909999918		88561305	2015-10-15	0	2
BW-13H	BW-13	9	9	7		18	665613	999079918		88561305	2015-10-15	0	2
BW-10 A	BW-10	9	9	7	17	18	665614	999071718		99561405	2015-10-15	0	2
BW-10D	BW-10	9	9	7	17	18	665614	999071718		99561405	2015-10-15	0	2
BW-10A	BW-10	9	9	7	17	18	665614	999071718		99561405	2015-10-15	0	2
BW-10C	BW-10	9	9	7	17	18	665614	999071718		99561405	2015-10-15	0	2
BW-10H	BW-10	9	9	7	17	18	665614	999071718		99561405	2015-10-15	0	2
BW-11 A	BW-11	9	9	7	17	18	665616	909071718		88561605	2015-10-15	0	2
BW-11F	BW-11	9	9	7	17	18	665616	999071718		88561605	2015-10-15	0	2
BW-12 A	BW-12	9	9	7	17	18	665616	999071718		99561605	2015-10-15	0	2
BW-12J	BW-12	9	9	7	17	18	665616	999071718		99561605	2015-10-15	0	2
BW-12D	BW-12	9	9	7	17	18	665616	999071718		99561605	2015-10-15	0	2
BW-14 A	BW-14	9	9	7	17	18	665619	909071718		88561905	2015-10-16	0	2
BW-14D	BW-14	9	9	7	17	18	665619	909071718		88561905	2015-10-16	0	2
BW-14C	BW-14	9	9	7	17	18	665619	999071718		88561905	2015-10-16	0	2
BW-14I	BW-14	9	9	7	17	18	665619	999071718		88561905	2015-10-16	0	2
BW-14A	BW-14	9	9	7		18	665619	999079918		88561905	2015-10-16	0	2
BW-15 A	BW-15	9	9	7	17	18	665613	909991718		88561307	2015-10-17	0	2
BW-15I	BW-15	9	9	7		18	665613	999079918		88561307	2015-10-17	0	2
BW-15G	BW-15	9	9	7		18	665613	999079918		88561307	2015-10-17	0	2
BW-16H	BW-16	9	9	7	17	18	665619	909991718		99561907	2015-10-18	0	2
BW-16 A	BW-16	9	9	7	17	18	665619	999071718		99561907	2015-10-18	0	2
BW-16A	BW-16	9	9	7	17	18	665619	999071718		99561907	2015-10-18	0	2
BW-16C	BW-16	9	9	7	17	18	665619	999071718		99561907	2015-10-18	0	2
BW-16E	BW-16	9	9	8		18	665619	999089918		99561907	2015-10-18	0	2
MES-5 A	MES-5	9	9	7	16	18	665404	909071618	665404	335087	2015-05-14	1	1
MES-5C	MES-5	9	9	7	16	18	665404	909071618	665404	335087	2015-05-14	1	1
MES-5E	MES-5	9	9	7	16	18	665404	999991618	665404	335087	2015-05-14	1	1
MES-6 A	MES-6	9	9	7	18	20	665408	909071820	665408	335172	2015-10-03	1	2
MES-6E	MES-6	9	9	7	18	20	665408	909071820	665408	335172	2015-10-03	1	2
MES-6C	MES-6	9	9	7	18	20	665408	909071820	665408	335172	2015-10-03	1	2
MES-6D	MES-6	9	9	7	18	21	665408	909071821	665408	335172	2015-10-03	1	2
MES-6B	MES-6	9	9	7	18	20	665408	9909071820	665408	335172	2015-10-03	1	2
MW-1A	MW-1	9	9	7	18		665408	909071899		99541103	2015-10-06	0	2
MW-1 A-	MW-1	9	9	7		20	665408	909079920		99541103	2015-10-06	0	2
MW-2 A-	MW-2		5	4	20	30	665408	9905042030		99541105	2015-10-08	0	2
MW-2B	MW-2		5	4	20	30	665408	9905042030		99541105	2015-10-08	0	2
MW-2C	MW-2		5	4	20	30	665408	9905042030		99541105	2015-10-08	0	2
MW-2A	MW-2		5	5		30	665408	9905059930		99541105	2015-10-08	0	2
MW-3A	MW-3	9	9	7	18		665408	999071899		99541107	2015-10-10	0	2
MW-3 A-	MW-3		5		20	30	665408	9905992030		99541107	2015-10-10	0	2
MES-7 A	MES-7	12	8	7	17	19	665412	1208071719	665412	335314	2016-05-03	1	3
MES-7B	MES-7	12	8	7	17	19	665412	1208071719	665412	335314	2016-05-03	1	3
MES-7E	MES-7	12	8	7	17	19	665412	1208071719	665412	335314	2016-05-03	1	3
MES-7A	MES-7	12	8	7	17	19	665412	1208071719	665412	335314	2016-05-03	1	3
MES-7D	MES-7	12	8	7		19	665412	9908079919	665412	335314	2016-05-03	1	3
